# Supplementary material for: Effect of Acute Exercise on Prostate Cancer Cell Growth
Source: PubMed Central journal article supplement (PMC3702495; doi:10.1371/journal.pone.0067579), 2013-07-05
Supplement: pone.0067579.s001.pdf [file pone.0067579.s001.pdf]

# Supplementary figure 1

1A

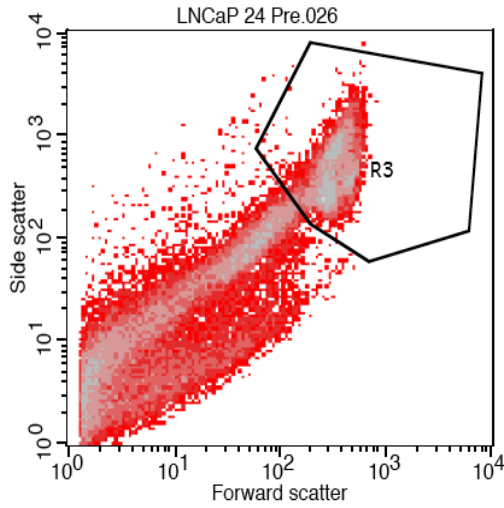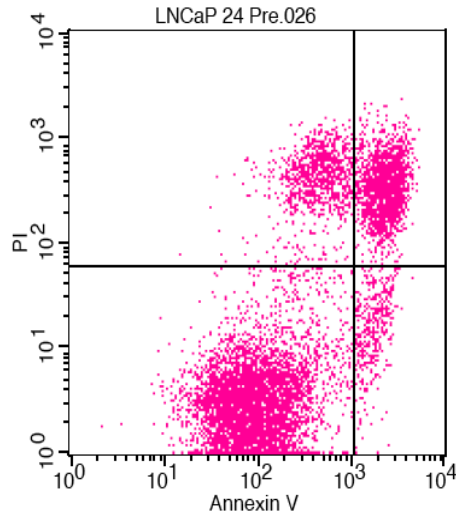

1B

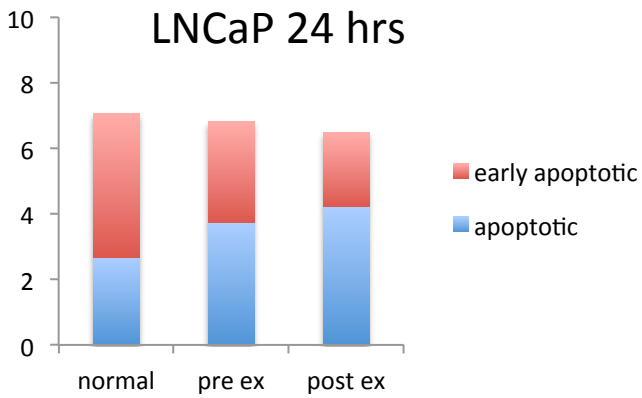

1C

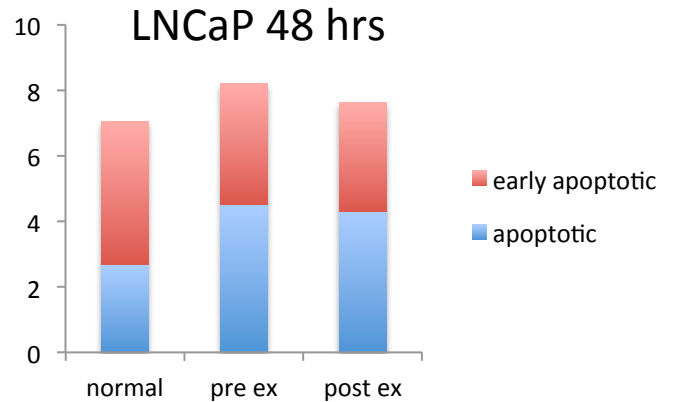

|                 |    | 24 hrs |       |          |
|-----------------|----|--------|-------|----------|
|                 |    | normal | rest  | exercise |
| necrotic        | UL | 6.27   | 5.67  | 5.9      |
| apoptotic       | UR | 2.68   | 4.5   | 4.31     |
| early apoptotic | LR | 4.38   | 3.71  | 3.3      |
| live            | LL | 86.66  | 86.12 | 86.5     |

|                 |    | 48 hrs |       |          |
|-----------------|----|--------|-------|----------|
|                 |    | normal | rest  | exercise |
| necrotic        | UL | 6.27   | 8.41  | 7.4      |
| apoptotic       | UR | 2.68   | 3.73  | 4.21     |
| early apoptotic | LR | 4.38   | 3.09  | 2.28     |
| live            | LL | 86.66  | 84.77 | 86.11    |
