# Supplementary material for: Effect of Acute Exercise on Prostate Cancer Cell Growth
Source: PubMed Central journal article supplement (PMC3702495; doi:10.1371/journal.pone.0067579), 2013-07-05

## Supplementary figure 2

2A

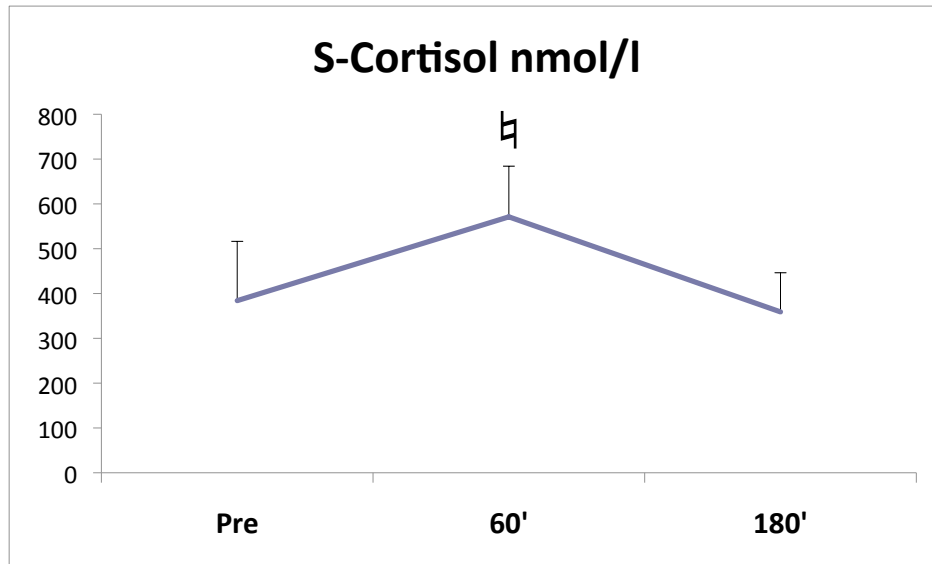

Supplement: pone.0067579.s002.pdf [file pone.0067579.s002.pdf]
